# Supplementary material
Source: bioRxiv or medRxiv preprint supplement (https://www.biorxiv.org/content/biorxiv/early/2019/12/02/862243/DC2/embed/media-2.pdf)
Supplement: Supplementary file [file media-2.pdf]

# Table S2

## *A. thaliana* (MA1\_1)

| context | annotation | alpha        | beta         | beta/alpha | FM         | RM        | F-value  | df RM | df FM | P--value     |
|---------|------------|--------------|--------------|------------|------------|-----------|----------|-------|-------|--------------|
| CG      | global     | 8.605897E-05 | 0.0002497981 | 2.903      | ABneutral  | Abnull    | 461.7119 | 350   | 346   | 2.70488E-137 |
| CG      | exon       | 0.0003329146 | 0.0008854249 | 2.660      | ABneutral  | Abnull    | 506.9881 | 350   | 346   | 2.99272E-143 |
| CG      | promoter   | 4.390624E-05 | 0.0003396206 | 7.735      | ABneutral  | Abnull    | 574.9184 | 350   | 346   | 2.19508E-151 |
| CG      | TE         | 2.777663E-05 | 7.500164E-06 | 0.270      | ABneutral  | Abnull    | 122.3618 | 350   | 346   | 6.001881E-65 |
| CG      | global     |              |              |            | ABselectUU | Abneutral | 0.4806   | 347   | 346   | 0.4885955    |
| CG      | exon       |              |              |            | ABselectUU | Abneutral | 0.0453   | 347   | 346   | 0.8316087    |
| CG      | promoter   |              |              |            | ABselectUU | Abneutral | 1.8765   | 347   | 346   | 0.1716251    |
| CG      | TE         |              |              |            | ABselectUU | Abneutral | 0.7210   | 347   | 346   | 0.3963924    |
| CG      | global     |              |              |            | ABselectMM | Abneutral | 0.4731   | 347   | 346   | 0.4920452    |
| CG      | exon       |              |              |            | ABselectMM | Abneutral | 0.1176   | 347   | 346   | 0.7318225    |
| CG      | promoter   |              |              |            | ABselectMM | Abneutral | 0.4049   | 347   | 346   | 0.5249724    |
| CG      | TE         |              |              |            | ABselectMM | Abneutral | 0.1476   | 347   | 346   | 0.7011182    |
| CHG     | global     | 3.533486E-06 | 5.84628E-05  | 16.545     | ABneutral  | Abnull    | 16.4449  | 350   | 346   | 2.399368E-12 |
| CHG     | exon       | 1.537786E-06 | 0.0002547714 | 165.674    | ABneutral  | Abnull    | 20.6207  | 350   | 346   | 2.958294E-15 |
| CHG     | promoter   | 2.408792E-06 | 0.0001227248 | 50.949     | ABneutral  | Abnull    | 19.3769  | 350   | 346   | 2.124209E-14 |
| CHG     | TE         | 2.124037E-05 | 3.025496E-05 | 1.424      | ABneutral  | Abnull    | 9.4822   | 350   | 346   | 2.768493E-07 |
| CHG     | global     |              |              |            | ABselectUU | Abneutral | 0.0000   | 347   | 346   | 1            |
| CHG     | exon       |              |              |            | ABselectUU | Abneutral | 0.0164   | 347   | 346   | 0.8980838    |
| CHG     | promoter   |              |              |            | ABselectUU | Abneutral | 0.0000   | 347   | 346   | 1            |
| CHG     | TE         |              |              |            | ABselectUU | Abneutral | 0.0000   | 347   | 346   | 1            |
| CHG     | global     |              |              |            | ABselectMM | Abneutral | 0.0000   | 347   | 346   | 1            |
| CHG     | exon       |              |              |            | ABselectMM | Abneutral | 0.0228   | 347   | 346   | 8.80E-01     |
| CHG     | promoter   |              |              |            | ABselectMM | Abneutral | 0.0000   | 347   | 346   | 1            |
| CHG     | TE         |              |              |            | ABselectMM | Abneutral | 0.0000   | 347   | 346   | 1            |
| CHH     | global     | 1.905105E-06 | 0.0001614412 | 84.741     | ABneutral  | Abnull    | 11.6186  | 350   | 346   | 7.294017E-09 |
| CHH     | exon       | 1.09903E-06  | 0.0006017335 | 547.513    | ABneutral  | Abnull    | 18.1246  | 350   | 346   | 1.577799E-13 |
| CHH     | promoter   | 1.349004E-06 | 0.0002622809 | 194.426    | ABneutral  | Abnull    | 19.3769  | 350   | 346   | 2.124209E-14 |
| CHH     | TE         | 5.54414E-06  | 6.181445E-05 | 11.150     | ABneutral  | Abnull    | 9.4822   | 350   | 346   | 2.768493E-07 |
| CHH     | global     |              |              |            | ABselectUU | Abneutral | 0.9755   | 347   | 346   | 0.3240002    |
| CHH     | exon       |              |              |            | ABselectUU | Abneutral | 0.0000   | 347   | 346   | 1            |
| CHH     | promoter   |              |              |            | ABselectUU | Abneutral | 0.0000   | 347   | 346   | 1            |
| CHH     | TE         |              |              |            | ABselectUU | Abneutral | 0.0000   | 347   | 346   | 1            |
| CHH     | global     |              |              |            | ABselectMM | Abneutral | 0.0000   | 347   | 346   | 1            |
| CHH     | exon       |              |              |            | ABselectMM | Abneutral | 0.0000   | 347   | 346   | 1            |
| CHH     | promoter   |              |              |            | ABselectMM | Abneutral | 0.0000   | 347   | 346   | 1            |
| CHH     | TE         |              |              |            | ABselectMM | Abneutral | 0.0000   | 347   | 346   | 1            |

FM = Full model

RM = Reduced model

df = degrees of freedom

Best performing model

Table S2: Epimutation rate estimates and model selection results for pedigree MA1\_1
